# Supplementary material
Source: PubMed Central journal article supplement (PMC2829167)
Supplement: emboj2009395s1.pdf [file emboj2009395s1.pdf]

## Supplementary Information

### Supplementary Figure legends

Figure S1. HCT116 cells were transiently transfected with a control scrambled shRNA and two different SMAR1 specific shRNA constructs (sh 745 and sh 1077). Decrease in SMAR1 expression with time is shown by Western blotting. The specificity of SMAR1 knockdown by the shRNA constructs was confirmed by targeting another abundant nuclear matrix protein Lamin C.

Figure S2. (A) Luciferase activity of full length p53AIP1 promoter upon SMAR1 over expression (FS) and knockdown (sh 745 & sh 1077). The SMAR1 truncation (F3 1-160 aa) lacking the DNA binding domain and protein interacting domain is used as a control. (B) Statistical representation of annexin-Cy3 stained apoptotic population analyzed in more than 50 ( $n > 50$ ) different fields. Bars indicate SD from three independent experiments.

Figure S3. (A) Cell cycle analyses of HEK293 cells treated with UV after knockdown of SMAR1 by sh 1077. Twenty four hours after shRNA transfection cells were either left untreated or treated with UV ( $5 \text{ J/m}^2$ ) and incubated for another 24 h. Cells were then fixed and stained with PI to determine apoptotic population.

(B) Knockdown of SMAR1 by sh 1077 in MCF-7 cells induces apoptosis as determined by PI staining.

(C) Mouse embryonic fibroblasts were transduced with control shRNA (Lv ctrl) and SMAR1 shRNA (LVsh 1077) lentivirus. Four days after viral transduction, MEFs were harvested, lysed and Western blotting done to determine the expression levels of Bax, Puma, p53, Ac-p53 and SMAR1.

(D) HCT116  $p53^{-/-}$  were transfected with control shRNA vector (C-sh, lane 1) and SMAR1 shRNA sh 1077 (SM-sh, lane 2). Thirty six hours post transfection cells were harvested and Western blotting done for Bax and Puma.

Figure S4. MAR prediction of (A) *BAX*, (B) *PUMA* and (C) *p53AIP1* promoters. Sequence in red denotes p53 response element (p53RE). Approximately 700 bp region of the three promoters upstream from transcription start site were analyzed using MARWIZ software. MAR potential is shown in the graph and the region corresponding to the MAR is coded yellow. The sequence in blue (corresponding to P1) and green (corresponding to P2) indicates the identical sequences of *BAX* and *PUMA* promoters. The exact location of these sequences with respect to MAR is shown in the MAR plot. (D) The purity of the nuclear matrix isolated from HCT116 cells was tested by Western blotting against antibody LaminB1 and Histone H1. (E) *In vivo* chromatin immunoprecipitation (ChIP) assay to detect promoter occupancy of SMAR1 on *p53AIP1* promoter upon low dose UV ( $5 \text{ J/m}^2$ ) irradiation. Cross-linked chromatin from UV irradiated cells were pulled with SMAR1 antibody and bound chromatin fragments were detected by specific PCR primers given in Table1. (F) Immunostaining of SMAR1 with nucleolar marker Nucleolin (C23) after low dose ( $5 \text{ J/m}^2$ ) UV irradiation showing nucleolar localization of SMAR1. Images are representative of more than 30 ( $n > 30$ ) from two independent experiments.

Figure S5. Immunostaining of PML and p53 in control HCT116 p53<sup>+/+</sup> cells and cells treated with low dose ( $5 \text{ J/m}^2$ ) and high dose ( $100 \text{ J/m}^2$ ) UV irradiation. P53 is stained with FITC (green), PML with Cy3 (red) and DNA is stained with DAPI (blue). Images are representative of more than 50 ( $n > 50$ ) from two independent experiments.

Figure S6. Cell cycle analysis in HCT116 p53<sup>+/+</sup> cells by propidium iodide staining depicting percentage apoptosis upon PML knockdown by siRNA in presence and absence of high dose apoptotic UV treatment ( $100 \text{ J/m}^2$ , 12 h).

Figure S7. HCT116 p53<sup>-/-</sup> cells were UV irradiated with apoptotic dose ( $100 \text{ J/m}^2$ , 24 h) and Western blotting was done for SMAR1, Bax and PML.

## Supplementary Tables

**Table1.**

**Primers for ChIP:**

|             |                                    |
|-------------|------------------------------------|
| BAX Fwd     | 5' TCA GCA CAG ATT AGT TTC TG      |
| BAX Rev     | 5' GGG ATT ACA GGC ATG AGC TA      |
| PUMA Fwd    | 5' GAT TAC AGG CAT GCG CCA CA      |
| PUMA Rev    | 5' ACC CAC ACT GAT GAT CAC AC      |
| p53AIP1 Fwd | 5' ACG TCG CAG GTG GAG AGA AT      |
| p53AIP1 Rev | 5' GGG ACA GCT GGA ATG TCA GT      |
| GAPDH Fwd   | 5' TTG CCA TCA ACG ACC CCT TC      |
| GAPDH Rev   | 5' AGA CTC CAC GAC ATA CTC AGC ACC |
| P21 Fwd     | 5' CGC TCT ACA TCT TCT GCC TT      |
| P21 Rev     | 5' GAC AGC GCT GGG AAG GAG C       |

**Table2.**

**Probe Sequence used for EMSA**

|          |                                             |
|----------|---------------------------------------------|
| Probe P1 | 5' GCAATTCCAGCTACTTGGGAGGCTGAGGCAGGAGAATTGC |
| Probe P2 | 5' GTAATCTCAGCACTTTGGGAGGCCAAGGTGCGAGGATCGC |

|          |                                             |
|----------|---------------------------------------------|
| Probe P3 | 5' AACTTCATATTCCTTTTCTTTTACACAAACACAAACATT  |
| Probe P4 | 5' TAATGTGTTAGCTGTGAAATTGTGTGAGTGCATTTGTGTA |

### Supplementary References:

Andersen JS, Lyon CE, Fox AH, Leung AK, Lam YW, Steen H, Mann M, Lamond AI. (2000) Directed proteomic analysis of the human nucleolus. *Curr Biol.* **12**: 1-11

Cockerill PN, Garrard WT (1986) Chromosomal loop anchorage of the kappa immunoglobulin gene occurs next to the enhancer in a region containing topoisomerase II sites. *Cell* **44**: 273-282

Rampalli S, Pavithra L, Bhatt A, Kundu TK, Chattopadhyay S (2005) Tumor suppressor SMAR1 mediates cyclin D1 repression by recruitment of the SIN3/histone deacetylase 1 complex. *Mol. Cell Biol.* **25**: 8415-8429

Tong-Chuan He, Shibin Z, Luis T, da Costa, Jian Yu, Kenneth WK, Vogelstein B (1998) A simplified system for generating recombinant adenoviruses. *Proc. Natl. Acad. Sci. USA* **95**: 2509-2514

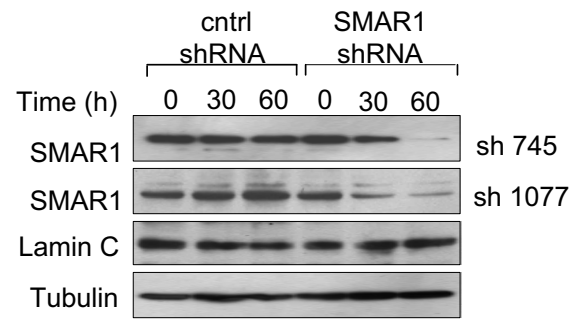

**Figure S1; Sinha et al.**

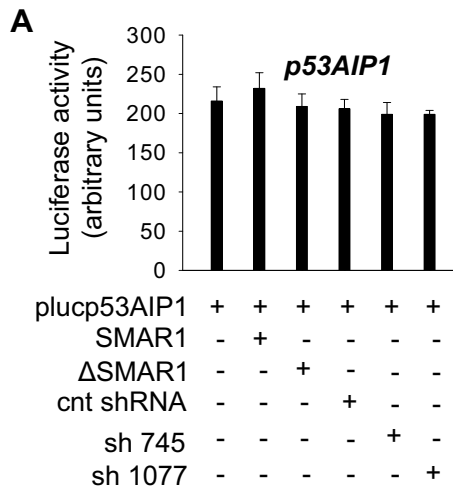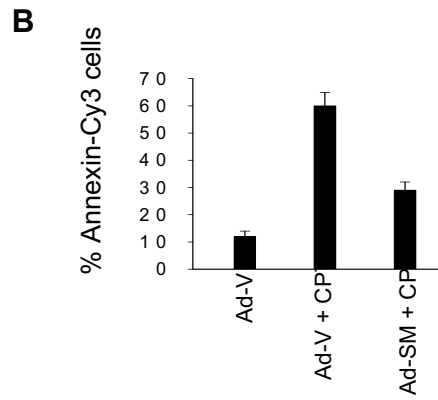

**Figure S2; Sinha et al.**

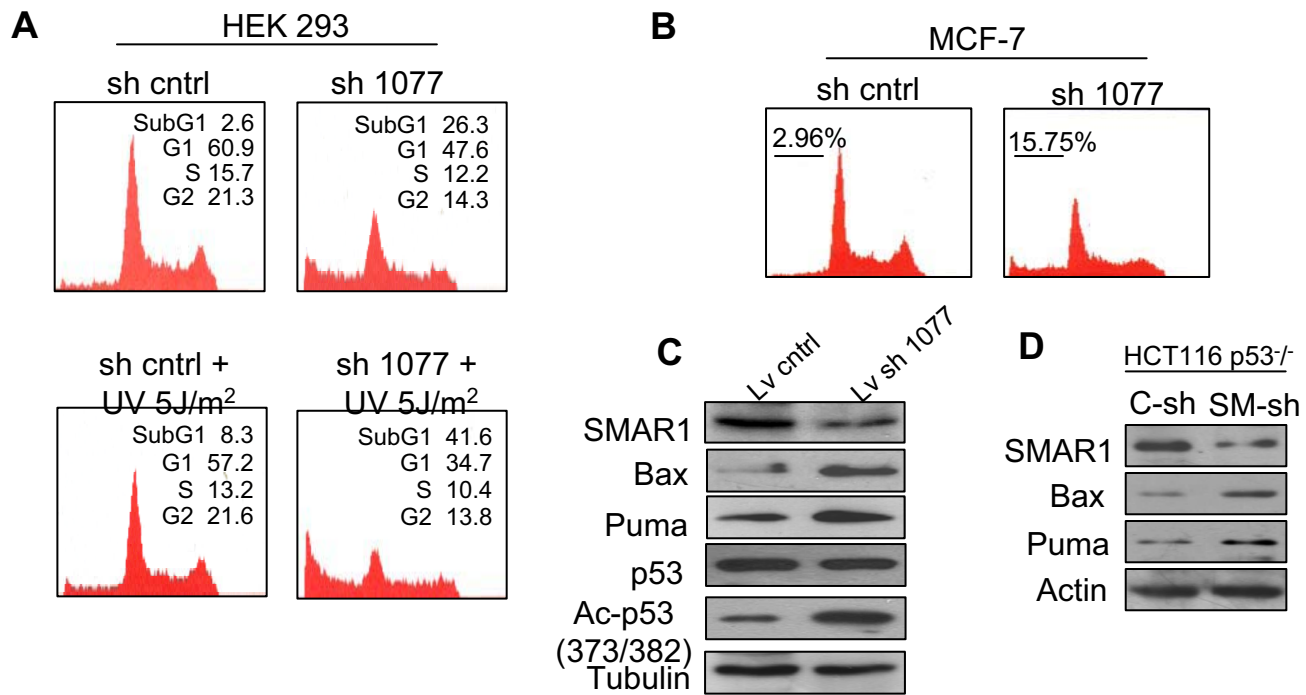

Figure S3; Sinha et al.

p53 response element  
 sequence P1  
 sequence P2  
 MAR region  
 Primers used in ChIP

BAX Promoter

```

CAATGAATTGTAATATGTGTATACCCGGCCGGGCACAGTGGCTCACGCC -1301
TGTAATCCCAGCACTTTGGGAGGCCGAGGTGGATCACTTGAGGTCA -1251
GGAGCTTGAGACCAGCCTTGACCAACATAGTGAAACCCCATCTTTACTAAA -1201
AATACAAAATTAGCTGGGCGTGGTGTGCGATGCCTGCAATTCCAGTACT -1151
TGGGAGCTGAGGCAGGAGAATTGCTTGAACCCGGAGGCAGAGGTTGCAG -1101
TAAGCCGAGATCGTGCCATTGCACTCCATCCTGGGCAACAAGAGCAAAAAC -1051
TCCGTCTCAAATAATAATAATAATAATAATAATAATAATAATAATAATG -1001
TGTATACCCATGTAAACACCATTTCAGATAAAAATATGGCATATTTGGGGC -951
ACCCGGGGAGTGTCTCTTGTGGCCCTCCCTCCATACCCTGCTGATCTA -901
TCAGCACAGATTAGTTTCTGCCACTTTTTAAACTTCATATTCCTTTTCTT -851
TTTACACAAACACAAACATTTCGAGTCATGACTGGGTGGGGTGGCTCAAGC -801
CTGTAATCTCAGCACTTTGGGAGGCCAAGGTGCGAGGATCGCTTGAGTCT -751
GGGAGTTCAGAGACCAGCCTGGGCAACATAGAGAGACCTCATCTCCACAT -701
AAAAAGTTTTAAAAATTAACCAGGGGCGGTGTAGTCCCAGCTACTCAGGA -651
GGCTGAGGTGGGAGGCTTCAGCCCGGAATTCCAGACTGCAGTGAGCCAT -601
GATTGGGCCACTGCACTCCAGCCTGGGCAACACAGTGAGACCCTGTCTCA -551
AAAAAAAAAAAAAAAAAAACAGGAAAAAAAAACAAACAGAAAAGCAGGC -501
CTGGCGCGGTAGCTCATGCCTGTAATCCAGCGCTTTGGAAGGCTGAGAC -451
GGGGTTATCTCTTGGGCTCACAAAGTTAGAGACAAGCCTGGGCGTGGGCTA -401
TATTGCTAGATCCAGGTCTCTGCAAAAAACAAACCCTCAGTTTTTAGT -351
CATCTATAACGTCTTGCCTGGAAGCATGCTATTTTGGGCCTCTGAGCTTT -301
TGCCTTGCTAATTCCTTCTGCGCTGGGGAGAGCTCAAACCCTGCCCGAA -251
ACTTCTAAAAATGGTGCCTGGATAAATGAAGGCATTAGAGCTGCGATTGG -201
ACGGACGGCTGTTGGACGGCGCCACTGCTGGCACTTATCGGGAGATGCTC -151
ATTGGACAGTCACGTGACGGGACCAACCTCCCAGGGAGCGAGGCAGGT -101
GCGGTCACGTGACCCGGCGGCCTGCGGGGCAGCGCCATTTTGCGGGGC -51
GGCCACGTGAAGGACGCACGTTTCAGCGGGGCTCTCACGTGACCCGGGCGC -1
  
```

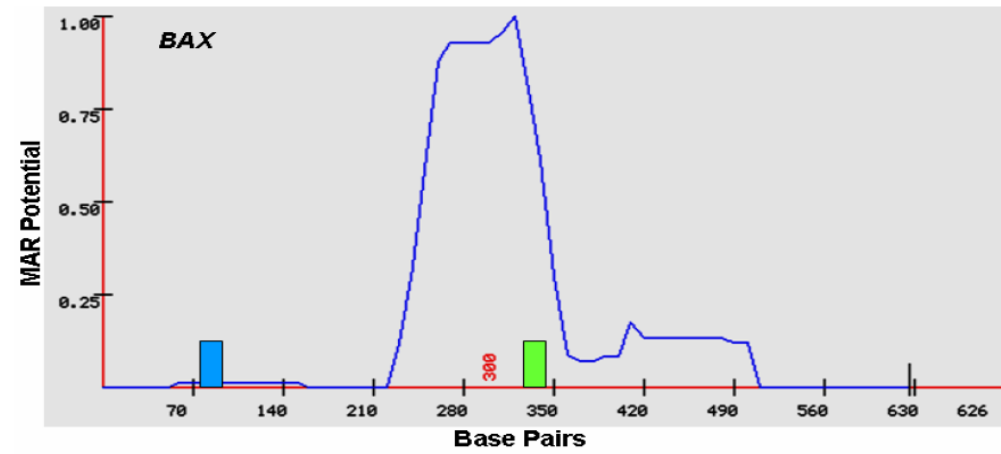

Figure S4A; Sinha et al.,



p53 response element  
 sequence P1  
 sequence P2  
 MAR region  
 Primers used in ChIP

**PUMA Promoter**

```

GCTTCCACGACGTGGGTCCCCTGCCAGATTTGTGGTGAGTGTGGCCAGGT -1301
GTGCATGCTCCGACGTGTGTGCAGTGGGCCAGTTAGCAAGAAGCTGTAC -1251
AGGTGTGACTTGTGACATGTGTGGGTGGTCAGTTTCTTCTATGTCTGAT -1201
TTGGTTTGTGTCTCTGAATGTCAGTTTCTTTCCCTTATTTTTATTTTAA -1151
GACGGAGTTTGTCTTGTGGCCAGGCTAGAGTGCAATGGCACTATCTCG -1101
GCTCACTGCAACCTCCGCTCCCGGGTTCAAGCAGTTCTCTCTGCCTCAGC -1051
CTCCAAGTAGCTGGGATTACAGGCATGCGCCACAACGCCCGGCTAATTT -1001
TGTATTTTTAGTAGAGATGGGGTTTCATCATGTTGGTCAGGCTGGTCTCG -951
AATTCCTGACCTCAGGCAGTCCAAGCACCTTGGCCTCCCAAAGTGTG -901
ATTACAGGCATGAGCCACCGTGTCCGGGCGAATGTCACCTTCTGATAGTTT -851
TAATGTGTTAGCTGTGAAATTTGTGTGAGTGCATTTGTGTATGTCCCTGTG -801
GGAGTGTGATTTGGATTTGGCCGTGTATCCAGGTATCCCTGTAAACAGGTG -751
TCTGTGTGTATGTGTGTGTCCCTGTGCCTATCAGCAAGTTTGTGTTCC -701
TGATAAGCACCTCCGCTATGTCTGTGTGGTTGCACCACCGTGTGTGTGGT -651
GTGGGTGCCTGTTCGGTAGGGTTGTTTGTGAACACAGTTTGTGGGCCAG -601
CTGTGATCATCAGTGTGGGTGTTTCTGCAACTGTGTGGCCCTGTCATT -551
GTGTCCGTCTGCTTGTCCAGGGGACCCTGTTAGTGTGAGTCTGTGCATTCC -501
GTCTGGGTGTGTGTAAGTGTGAGCCCCATCAGTATGTGAGTGTGTGTGCT -451
CATGCCCTGTCCATGGTGTGGATTTGCGAGACTGTGGCCTTGTGTCTGT -401
GAGTACATCCTCTGGGCTCTGCCTGCACGTGACTTTGTGGACCCCTGGAAC -351
GCCCGTCCGGTCCGTCTGTGTACGCATCGCTGGGGGTGTGGATCTGTGGGT -301
CCCAGTCAGTGTGTGTCCGACTGTCCCGGTGTCTGGGCGATCTCCCCA -251
CACCCCGCCGCACAGCGCCTGGGTCCCTCCTTGCCTTGGGCTAGGCCCTGC -201
CCCGTCCCCCGCTGCAGGGAAACCCCGGCGCGGAGGTAGGGGGGGGCGC -151
GGCGCGCGCCTGCAAGTCTGACTTGTCGCGCGGGCGGGCGGGGGCCGT -101
AGCGTCACGCGGGGGCGGGGCGTGGGACCCGCGGGCGGGGGCGGGGCGG -51
GGCGGGGGCGGGGCGGCTTTGGAGCGGGGCCGGGATCCGCCGGGCGGGCCTG -1
  
```

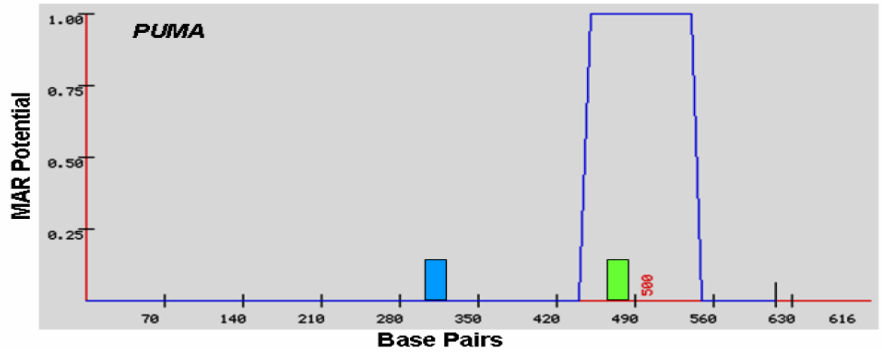

Figure S4B; Sinha et al.,

p53 response element  
 sequence P1  
 sequence P2  
 MAR region  
 Primers used in ChIP

**p53AIP1 Promoter**

```

gttagggaggcttctccttaaataacttccctgttccgtctcagagaaccca -1051
tggacactggccaggggagggagaggaacacgtcgcagggtggagagaat -1001
cgcttgtgtgagggcacagagcggggcaagaagacagtgggtgggctttcc -901
ccaggagctgttcggcagagggaaagtggatgctgagctcttccctcttcc -851
ctggagcaagtcccatttcctcagagaacacggcccccttggggccaaaag -801
gacatgaagaagctcttgctaatgccagcctggctctcctcatcccgcc -701
cctgcacccctgcccttctggctgccctcccttctcctagctctgtcccc -651
tctcacttcaggagtctcaagtccctcagactactccaaagtccgggggat -601
ctctggatgggtaggaggtgatctcaccgcctcctccttgccccgggctt -551
gtcagatgaacttctgatgctggcggcgctgaagctgacactagcgggg -501
ggcacctccctgacatgaacgccctcgagactgggccagtgctcctgat -451
gcctgggcacctgcggaaggcaccacagcgtggccggcctggcatgcctt -401
gagtgtgtgggtgggactgttgcaaacactgacattccagctgtcccc -351
cattttgtgctgctctcacacaaccccgagagtgggcgattcacaaagg -301
acagaaatgtatcttccacagctctggagccaggtgccagcaggttctg -251
tgccctggatggctccagtctctgctttcatgatggtgcccttgctgctg -201
cgctctccagaagggacaaaggctgccgtcctcacatggctgaagggtga -151
agggcaacgagtgaatgtactccctccacacagcacctacatcaggacac -101
ctgattccattcatggcctaataccctcttaaggccccacctcttaatgc -51
tagcacattggcaacacctggatcttgggggggaaacacgttcaaaccat -1
  
```

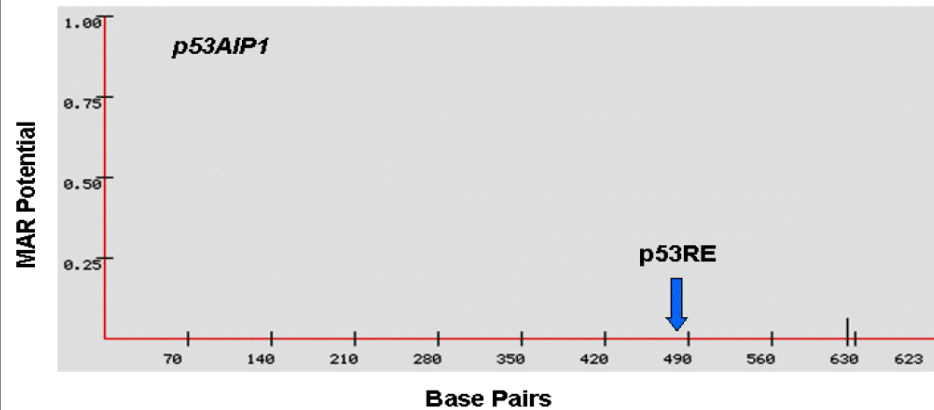

Figure S4C; Sinha et al.,

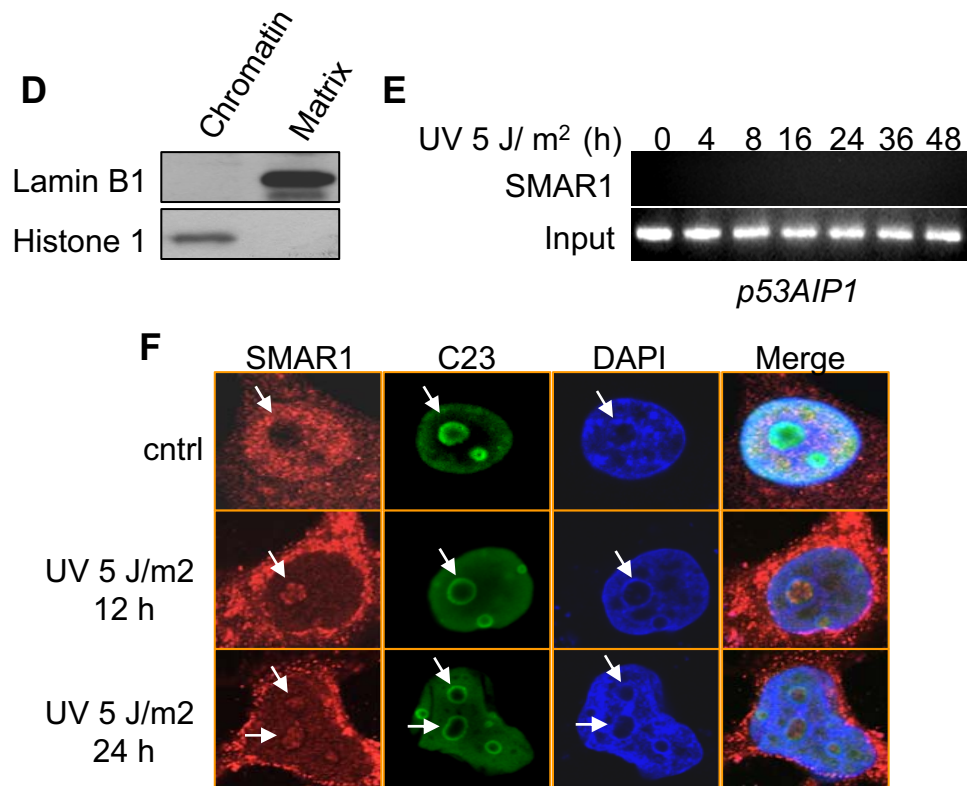

Figure S4; Sinha et al.

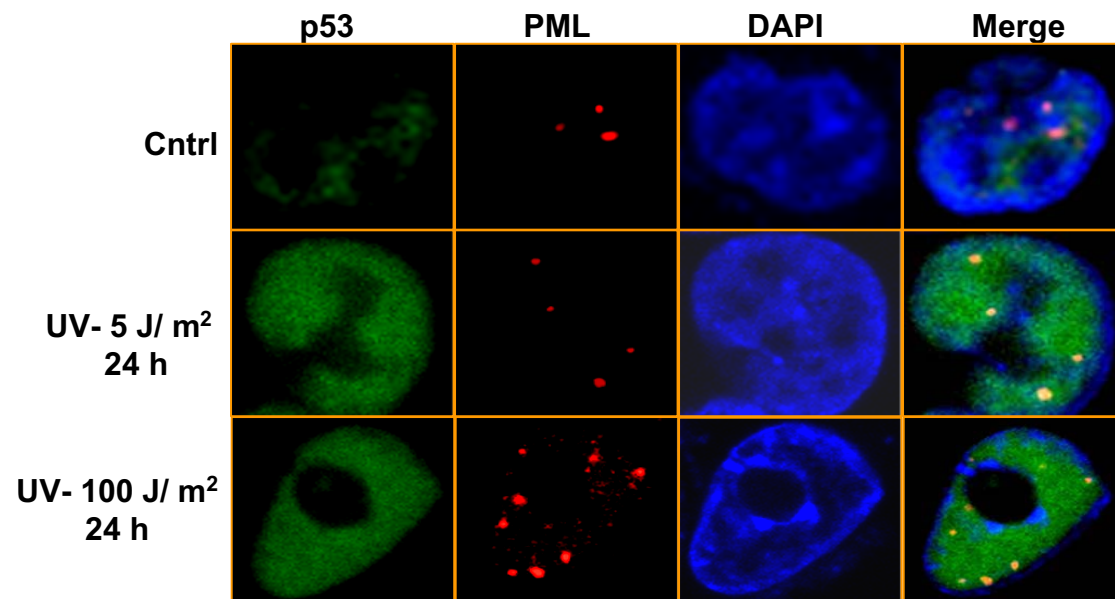

Figure S5; Sinha et al.

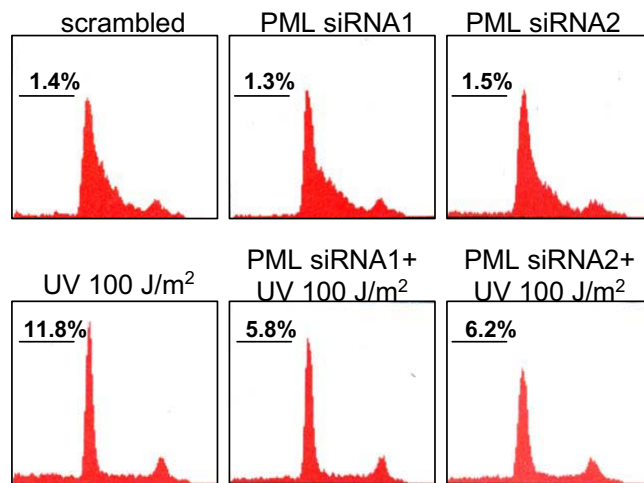

**Figure S6, Sinha et al.**

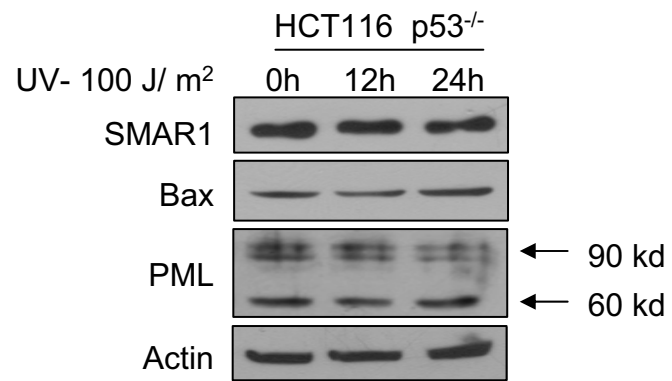

**Figure S7; Sinha et al.**
