# Supplementary material
Source: PubMed Central journal article supplement (PMC2829167)
Supplement: emboj2009395s2.pdf [file emboj2009395s2.pdf]

Manuscript EMBO-2008-70173

## **Coordinated Regulation of p53 Apoptotic Targets BAX and PUMA by SMAR1 through an Identical MR Element**

Surajit Sinha, Sunil Kumar Malonia, Smriti P K Mittal, Kamini Singh,  
Sreenath Kadreppa, Rohan Kamat, Robin Mukhopadhyay, Jayanta K Pal and Samit Chattopadhyay

*Corresponding author: Samit Chattopadhyay, National Centre for Cell Science*

---

### **Review timeline:**

|                  |                  |
|------------------|------------------|
| Submission date: | 15 December 2008 |
| Accepted:        | 10 December 2009 |

---

### **Transaction Report:**

An earlier version of this manuscript was submitted to *The EMBO Journal* and assessed before January 2009. As the original review of the manuscript therefore predates the implementation of *The EMBO Journal's* transparent review process policy, no Review Process File is available with this article.
